# Supplementary material
Source: MDPI journal article supplement (https://www.mdpi.com/2311-5629/9/1/34)
Supplement: s1 [file s1]

Supplementary

# Agro-Industrial Waste Biochar Abated Nitrogen Leaching from Tropical Sandy Soils and Boosted Dry Matter Accumulation in Maize

Michael Egyir <sup>1,2</sup>, Innocent Yao Dotse Lawson <sup>1,\*</sup>, Daniel Etsey Dodor <sup>1</sup> and Deogratius Luyima <sup>2,\*</sup>

<sup>1</sup> Department of Soil Science, College of Basic and Applied Sciences, University of Ghana, Legon P.O. Box LG 25, Ghana; miki.egyir@gmail.com (M.E.); dedodor@ug.edu.gh (D.E.D.)

<sup>2</sup> Department of Agricultural Chemistry, College of Agriculture and Life Sciences, Chungnam National University, Daejeon 34134, Republic of Korea

\* Correspondence: idlawson@ug.edu.gh (I.Y.D.L.); deoluyima@gmail.com or deoluyima@o.cnu.ac.kr (D.L.)

**Table S1: Some physico-chemical properties of the biochar used**

| Biochar type                           | SD     | RH      | CC     |
|----------------------------------------|--------|---------|--------|
| pH                                     | 8.06   | 7.35    | 7.47   |
| Total P (mg/kg)                        | 896.24 | 1246.15 | 938.01 |
| Total surface area (m <sup>2</sup> /g) | 3.62   | 3.02    | 2.69   |
| Exchangeable bases (%)                 |        |         |        |
| Ca <sup>2+</sup>                       | 1.23   | 0.58    | 0.71   |
| Mg <sup>2+</sup>                       | 0.68   | 0.30    | 0.39   |
| K <sup>+</sup>                         | 1.19   | 0.80    | 0.86   |
| Na <sup>+</sup>                        | 1.89   | 1.43    | 1.27   |

SD: Sawdust   RH: Rice husk   CC: Corn cob

**Table S2: Amount of  $\text{NH}_4^+\text{-N}$  and  $\text{NO}_3^-\text{-N}$  retained by biochar**

| Biochar type | Fertilizer                   | Amount of nitrogen retained (mg/kg biochar) |                |
|--------------|------------------------------|---------------------------------------------|----------------|
|              |                              | $\text{NH}_4$                               | $\text{NO}_3$  |
| SD           | $(\text{NH}_4)_2\text{SO}_4$ | 2273.4±326.05                               | NA             |
| SD           | $\text{KNO}_3$               | NA                                          | 2283.93±229.88 |
| SD           | $\text{NH}_4\text{NO}_3$     | 2475.1±291.55                               | 2241.44±231.41 |
| RH           | $(\text{NH}_4)_2\text{SO}_4$ | 1809.57±145.18                              | NA             |
| RH           | $\text{KNO}_3$               | NA                                          | 1743.33±152.66 |
| RH           | $\text{NH}_4\text{NO}_3$     | 1703.88±198.20                              | 1860.32±139.18 |
| CC           | $(\text{NH}_4)_2\text{SO}_4$ | 1756.7±188.90                               | NA             |
| CC           | $\text{KNO}_3$               | NA                                          | 1881.31±200.97 |
| CC           | $\text{NH}_4\text{NO}_3$     | 1022.38±188.09                              | 1569.08±211.49 |

---

NA: not applicable

**Table S3: Residual soil available N**

| Seasons                   | Soils | Biochar    | NO <sub>3</sub> <sup>-</sup> -N/ NH <sub>4</sub> <sup>+</sup> -N (mg/kg) |                              |                              |                              |                              |                              |                              |                              |
|---------------------------|-------|------------|--------------------------------------------------------------------------|------------------------------|------------------------------|------------------------------|------------------------------|------------------------------|------------------------------|------------------------------|
|                           |       | Amendments | ASP                                                                      |                              | ASS                          |                              | CD                           |                              | CDASS                        |                              |
|                           |       |            | NH <sub>4</sub> <sup>+</sup>                                             | NO <sub>3</sub> <sup>-</sup> | NH <sub>4</sub> <sup>+</sup> | NO <sub>3</sub> <sup>-</sup> | NH <sub>4</sub> <sup>+</sup> | NO <sub>3</sub> <sup>-</sup> | NH <sub>4</sub> <sup>+</sup> | NO <sub>3</sub> <sup>-</sup> |
| 1 <sup>st</sup><br>season | K     | Cn         | 18.43a                                                                   | 18.86f                       | 19.77a                       | 17.99f                       | 21.21a                       | 18.8f                        | 22.42a                       | 19.64f                       |
|                           |       | RH20       | 39.62c                                                                   | 80.1h                        | 43.35c                       | 81.1h                        | 44.06c                       | 79.42h                       | 41.82c                       | 81.01h                       |
|                           |       | RH40       | 40.11c                                                                   | 84.87h                       | 43.44c                       | 76.83h                       | 41.21c                       | 76.57h                       | 43.4c                        | 78.78h                       |
|                           |       | SD20       | 39.79c                                                                   | 79.29h                       | 42.85c                       | 78.43h                       | 41.96c                       | 79.61h                       | 44.27c                       | 80.15h                       |
|                           |       | SD40       | 45.08c                                                                   | 77.87h                       | 44.47c                       | 81.72h                       | 48.4c                        | 65.93h                       | 45.75c                       | 76.96h                       |
|                           | Ny    | Cn         | 26.66b                                                                   | 33.32g                       | 27.85b                       | 34.03g                       | 29.84b                       | 38.75g                       | 29.53b                       | 42.45g                       |
|                           |       | RH20       | 54.49d                                                                   | 96.73j                       | 53.98d                       | 92.69j                       | 55.22d                       | 102.16j                      | 53.63d                       | 99.82j                       |
|                           |       | RH40       | 56.51d                                                                   | 95.53j                       | 55.45d                       | 100.29j                      | 55.54d                       | 97.46j                       | 57.88c                       | 94.2j                        |
|                           |       | SD20       | 56.27d                                                                   | 96.09j                       | 52.17d                       | 93.02j                       | 56.13d                       | 104.56j                      | 52.84d                       | 95.61j                       |
|                           |       | SD40       | 55.93d                                                                   | 93.94j                       | 54.57d                       | 95.38j                       | 57.51d                       | 100.44j                      | 58.24d                       | 105.19j                      |
| 2 <sup>nd</sup><br>Season | K     | Cn         | 6.14r                                                                    | 12.51u                       | 6.59r                        | 11.12u                       | 9.07r                        | 10.42u                       | 7.44r                        | 9.03u                        |
|                           |       | RH20       | 19.71t                                                                   | 39.12w                       | 14.65t                       | 34.83w                       | 15.53t                       | 43.52w                       | 16.05t                       | 34.38w                       |
|                           |       | RH40       | 16.83t                                                                   | 39.46w                       | 19.73t                       | 38.13w                       | 20.19t                       | 40.59w                       | 20.99t                       | 43.99w                       |

|  |    |      |         |        |         |        |        |        |        |        |
|--|----|------|---------|--------|---------|--------|--------|--------|--------|--------|
|  |    | SD20 | 12.80t  | 42.77w | 17.88t  | 35.17w | 19.16t | 34.08w | 16.37t | 42.51w |
|  |    | SD40 | 16.42t  | 33.21w | 17.24t  | 32.35w | 19.34t | 37.6w  | 18.66t | 37.93w |
|  | Ny | Cn   | 11.92rs | 18.49v | 12.49rs | 16.82v | 15.86s | 17.56v | 10.7r  | 18.5v  |
|  |    | RH20 | 27.65p  | 58.47y | 29.89p  | 54.48y | 28.64p | 56.83y | 28.75p | 60.49y |
|  |    | RH40 | 31.29p  | 61.68y | 31.97p  | 55.97y | 29.29p | 5.66y  | 34.91p | 53.62y |
|  |    | SD20 | 27.95p  | 57.95y | 35.25p  | 60.66y | 27.12p | 55.84y | 33.29p | 63.04y |
|  |    | SD40 | 35.23p  | 59.84y | 28.87p  | 53.48y | 38.92p | 52.87y | 34.87p | 58.95y |
